# Supplementary material for: Sahara Desert sand “Chitligsan”: characterisation and assessment of antibacterial activity and cytotoxicity
Source: RSC Adv. 2026 Jan 15;16(4):3395–408. doi: 10.1039/d5ra04969e (PMC12805422; doi:10.1039/d5ra04969e)
Supplement: RA-016-D5RA04969E-s001 [file RA-016-D5RA04969E-s001.xlsx]

## Sheet: Chitosan_Sigma Standard
Show/Hide	Label	RT	Width	Height	Area	Score	Base Peak	Ions	Formula	Precursor	Score (Lib)	Lib/DB	Cpd	Name	Hit Count	CAS ID	RT Diff
True	Cpd 3: 1,1-bis(bromanyl)-2-chloranyl-2-fluoranyl-cyclopropane	0.621	0.052	114940	157199	85.68	44	3	C3 H2 Br2 Cl F	44	85.68	W12N20_MAIN.L	3	1,1-bis(bromanyl)-2-chloranyl-2-fluoranyl-cyclopropane	5	24071-57-6	15.279
True	Cpd 6: Propene	1.463	0.058	130033	434705	98.94	41	7	C3 H6	41	98.94	W12N20_MAIN.L	6	Propene	10	115-07-1	3.704
True	Cpd 9: Acetaldehyde P1	1.502	0.11	481239	1879213	91.65	29	13	C2 H4 O	29	91.65	PMW_Tox3.l	9	Acetaldehyde P1	10	75-07-0	30198.7
True	Cpd 10: 2-Butene, (E)-	1.511	0.123	83537	709225	83.27	41	14	C4 H8	41	83.27	NIST23.L	10	2-Butene, (E)-	10	624-64-6	5.272
True	Cpd 14: 2-Propenal	1.608	0.11	158135	535814	92.25	56	8	C3 H4 O	56	92.25	W12N20_MAIN.L	14	2-Propenal	10	107-02-8	6.692
True	Cpd 15: Butane P183	1.617	0.117	207866	1538623	85.63	43	16	C4 H10	43	85.63	MPW2011.L	15	Butane P183	10	106-97-8	5.049
True	Cpd 16: 4,7-Epoxyisobenzofuran-1(3H)-one-3,3-D2, 3a,4,7,7a-tetrahydro-	1.633	0.13	73113	249037	85.74	39	4	C8 H6 D2 O3	39	85.74	W12N20_MAIN.L	16	4,7-Epoxyisobenzofuran-1(3H)-one-3,3-D2, 3a,4,7,7a-tetrahydro-	10	96995-04-9
True	Cpd 20: (bistrifluoromethylamino-oxy)cyclopentane	1.752	0.104	22304	74484	87.82	69	4	C7 H9 F6 N O	69	87.82	W12N20_MAIN.L	20	(bistrifluoromethylamino-oxy)cyclopentane	10	990147-04-7	7.481
True	Cpd 25: 1,3,3,5-Pentanetetracarbonitrile	1.837	0.097	23439	75456	83	54	10	C9 H8 N4	54	83	W12N20_MAIN.L	25	1,3,3,5-Pentanetetracarbonitrile	1	990033-33-4	28.363
True	Cpd 26: Methyl vinyl ketone	1.864	0.11	96034	400947	83.22	43	17	C4 H6 O	43	83.22	NIST23.L	26	Methyl vinyl ketone	10	78-94-4	7.719
True	Cpd 27: Pentanal, 4-oxo-	1.904	0.039	112474	244092	95.86	43	4	C5 H8 O2	43	95.86	W12N20_MAIN.L	27	Pentanal, 4-oxo-	10	626-96-0	12.146
True	Cpd 29: Furan, 3-methyl-	1.935	0.123	23709	161277	95.28	82	14	C5 H6 O	82	95.28	W12N20_MAIN.L	29	Furan, 3-methyl-	10	930-27-8	8.765
True	Cpd 31: Acetic acid	2.029	0.207	234155	3128077	99.7	43	14	C2 H4 O2	43	99.7	NIST23.L	31	Acetic acid	10	64-19-7	8.471
True	Cpd 34: 1,4-Cyclohexadiene	2.135	0.052	16392	52180	80.27	79	7	C6 H8	79	80.27	W12N20_MAIN.L	34	1,4-Cyclohexadiene	10	628-41-1	9.265
True	Cpd 35: 2-Methyloxazole	2.156	0.097	258672	995247	89.94	83	22	C4 H5 N O	83	89.94	W12N20_MAIN.L	35	2-Methyloxazole	10	990000-18-3	9.178
True	Cpd 36: 3-Butenenitrile	2.184	0.143	29167	208816	92.38	41	13	C4 H5 N	41	92.38	W12N20_MAIN.L	36	3-Butenenitrile	10	109-75-1	8.716
True	Cpd 37: 2-Butenal, (Z)-	2.188	0.175	29167	168291	91.33	41	6	C4 H6 O	41	91.33	W12N20_MAIN.L	37	2-Butenal, (Z)-	10	15798-64-8	8.062
True	Cpd 38: 2-Oxetanone, 4-methyl-	2.21	0.149	42388	253827	80.26	41	8	C4 H6 O2	41	80.26	NIST23.L	38	2-Oxetanone, 4-methyl-	6	3068-88-0	9.857
True	Cpd 41: 2-Propanone, 1-hydroxy-	2.274	0.117	337196	919813	81.27	43	32	C3 H6 O2	43	81.27	NIST23.L	41	2-Propanone, 1-hydroxy-	10	116-09-6	8.759
True	Cpd 43: Methyl 3-hydroxy-2-(p-toluenesulfonyloxy)methyl-10-tetrahydropyranyloxydecanoate	2.314	0.084	1200	4174	87.49	84	2	C24 H38 O8 S	84	87.49	W12N20_MAIN.L	43	Methyl 3-hydroxy-2-(p-toluenesulfonyloxy)methyl-10-tetrahydropyranyloxydecanoate	8	990600-50-8	57.236
True	Cpd 44: 3-Penten-1-yne, 3-methyl-	2.337	0.078	16191	71208	93.46	79	14	C6 H8	79	93.46	NIST23.L	44	3-Penten-1-yne, 3-methyl-	10	1574-33-0	7.963
True	Cpd 45: 1,3-Butadiene, 1-methoxy-	2.347	0.091	7691	37009	84.06	41	6	C5 H8 O	41	84.06	W12N20_MAIN.L	45	1,3-Butadiene, 1-methoxy-	4	3036-66-6	7.52
True	Cpd 48: Cyclopropanecarbonitrile	2.411	0.11	9705	82252	91.66	41	13	C4 H5 N	41	91.66	W12N20_MAIN.L	48	Cyclopropanecarbonitrile	10	5500-21-0	8.689
True	Cpd 54: Furan, 2-ethyl-	2.569	0.071	6681	36184	89.24	81	16	C6 H8 O	81	89.24	NIST23.L	54	Furan, 2-ethyl-	10	3208-16-0	9.148
True	Cpd 55: Propanoic acid	2.606	0.162	9136	120723	90.52	74	10	C3 H6 O2	74	90.52	W12N20_MAIN.L	55	Propanoic acid	10	79-09-4	8.66
True	Cpd 56: Furan, 2,5-dimethyl-	2.628	0.078	11785	79257	95.47	96	21	C6 H8 O	96	95.47	W12N20_MAIN.L	56	Furan, 2,5-dimethyl-	10	625-86-5	9.572
True	Cpd 57: Acetoin	2.654	0.065	7359	20868	86.88	45	3	C4 H8 O2	45	86.88	W12N20_MAIN.L	57	Acetoin	10	513-86-0	9.296
True	Cpd 58: 1,4-Hexadiene, 2-methyl-	2.689	0.104	1184	13804	82.06	81	10	C7 H12	81	82.06	W12N20_MAIN.L	58	1,4-Hexadiene, 2-methyl-	5	1119-14-8	8.844
True	Cpd 61: Pyrazine	2.869	0.11	559059	1344204	99.25	80	22	C4 H4 N2	80	99.25	W12N20_MAIN.L	61	Pyrazine	10	290-37-9	8.265
True	Cpd 62: 2H-Pyrrol-2-one, 1,5-dihydro-1-methyl-	2.876	0.156	13041	110130	89.37	97	11	C5 H7 N O	97	89.37	W12N20_MAIN.L	62	2H-Pyrrol-2-one, 1,5-dihydro-1-methyl-	10	13950-21-5	12.157
True	Cpd 65: 1H-Pyrrole, 1-methyl-	2.975	0.104	18222	131918	84.5	80	20	C5 H7 N	80	84.5	W12N20_MAIN.L	65	1H-Pyrrole, 1-methyl-	10	96-54-8	8.309
True	Cpd 67: Pyridine	3.013	0.13	193169	894713	99.29	79	20	C5 H5 N	79	99.29	NIST23.L	67	Pyridine	10	110-86-1	9.103
True	Cpd 72: Pyrrole	3.123	0.123	293177	1227294	98.1	67	23	C4 H5 N	67	98.1	NIST23.L	72	Pyrrole	10	109-97-7	9.661
True	Cpd 75: Oxazole, 4,5-dimethyl-	3.196	0.065	2904	13407	83.46	97	11	C5 H7 N O	97	83.46	W12N20_MAIN.L	75	Oxazole, 4,5-dimethyl-	10	20662-83-3	9.637
True	Cpd 77: 1-Hydroxy-2-butanone	3.264	0.13	27914	134238	81.51	57	19	C4 H8 O2	57	81.51	W12N20_MAIN.L	77	1-Hydroxy-2-butanone	10	5077-67-8	10.036
True	Cpd 78: 5-Ethylidenecyclopenta-1,3-diene	3.271	0.13	37129	247512	86.33	91	25	C7 H8	91	86.33	W12N20_MAIN.L	78	5-Ethylidenecyclopenta-1,3-diene	10	990000-43-2	9.196
True	Cpd 79: 3-(Ethyl)isoxazole	3.286	0.091	6822	36081	89.42	97	6	C5 H7 N O	97	89.42	W12N20_MAIN.L	79	3-(Ethyl)isoxazole	8	30842-92-3	9.714
True	Cpd 88: 2-Pentenenitrile	3.478	0.162	11421	98867	92.48	41	19	C5 H7 N	41	92.48	W12N20_MAIN.L	88	2-Pentenenitrile	10	13284-42-9	9.389
True	Cpd 89: 1,3-Dimethyl-3-propylazetidine-2,4-dione	3.489	0.039	652	1019	83.52	69	2	C8 H13 N O2	69	83.52	W12N20_MAIN.L	89	1,3-Dimethyl-3-propylazetidine-2,4-dione	4	74255-31-5	18.261
True	Cpd 92: (CH3)2C=CHCN	3.544	0.207	14945	128222	90.15	41	17	C5 H7 N	41	90.15	W12N20_MAIN.L	92	(CH3)2C=CHCN	10	4786-24-7	8.94
True	Cpd 93: .epsilon.-Methyl-.epsilon.-caprolactone	3.55	0.207	14945	108413	90.57	41	7	C7 H12 O2	41	90.57	W12N20_MAIN.L	93	.epsilon.-Methyl-.epsilon.-caprolactone	10	2549-59-9	15.217
True	Cpd 94: Guanidine	3.582	0.415	105722	2501684	86.02	44	9	C H5 N3	44	86.02	W12N20_MAIN.L	94	Guanidine	10	113-00-8
True	Cpd 98: 3(2H)-furanone	3.632	0.13	37059	126698	93.93	84	13	C4 H4 O2	84	93.93	W12N20_MAIN.L	98	3(2H)-furanone	10	990000-19-3	8.735
True	Cpd 99: 2-Isopropylfuran	3.677	0.091	6640	20948	81.82	95	13	C7 H10 O	95	81.82	W12N20_MAIN.L	99	2-Isopropylfuran	10	990001-54-3	9.273
True	Cpd 103: Pyridine, 2-methyl-	3.884	0.155	116917	719263	98.25	93	29	C6 H7 N	93	98.25	W12N20_MAIN.L	103	Pyridine, 2-methyl-	10	109-06-8	9.233
True	Cpd 104: 2-Naphthalenesulfonic acid	3.929	0.065	1951	4832	85.86	207	5	C10 H8 O3 S	207	85.86	W12N20_MAIN.L	104	2-Naphthalenesulfonic acid	10	120-18-3	27.605
True	Cpd 105: 1-Acetoxymethyloxyundecane	3.947	0.045	4981	10277	80.75	43	2	C14 H28 O3	43	80.75	W12N20_MAIN.L	105	1-Acetoxymethyloxyundecane	8	990164-44-0	23.653
True	Cpd 106: Pyrazine, methyl-	3.966	0.136	220506	907948	97.86	94	27	C5 H6 N2	94	97.86	NIST23.L	106	Pyrazine, methyl-	10	109-08-0	9.967
True	Cpd 107: (2R,5S)-2,5-dimethylpyrrolidine	3.981	0.058	2474	4771	80.29	84	3	C6 H13 N	84	80.29	W12N20_MAIN.L	107	(2R,5S)-2,5-dimethylpyrrolidine	5	39713-71-8	10.469
True	Cpd 111: N-[(1R,2S)-1-hydroxy-1-phenylpropan-2-yl]propanamide	4.039	0.032	750	1080	85.38	83	2	C12 H17 N O2	83	85.38	W12N20_MAIN.L	111	N-[(1R,2S)-1-hydroxy-1-phenylpropan-2-yl]propanamide	1	990085-32-0	25.777
True	Cpd 113: 2-Vinyl-5-methylfuran	4.088	0.065	2964	15272	81.46	108	11	C7 H8 O	108	81.46	W12N20_MAIN.L	113	2-Vinyl-5-methylfuran	10	990001-36-4	9.595
True	Cpd 116: 2-Cyclopenten-1-one	4.128	0.078	37945	227698	96.36	82	22	C5 H6 O	82	96.36	W12N20_MAIN.L	116	2-Cyclopenten-1-one	10	930-30-3	8.422
True	Cpd 118: Z-(3-(2)H)-2-Methylprop-2-en-1-ol	4.15	0.376	3934	44018	82.96	73	3	C4 H7 D O	73	82.96	W12N20_MAIN.L	118	Z-(3-(2)H)-2-Methylprop-2-en-1-ol	5	990000-07-1
True	Cpd 119: 3-Oxa-7-thiatricyclo[3.3.0.0(2,4)]octane 7,7-dioxide	4.164	0.104	4469	13797	82.26	94	3	C6 H8 O3 S	94	82.26	W12N20_MAIN.L	119	3-Oxa-7-thiatricyclo[3.3.0.0(2,4)]octane 7,7-dioxide	4	990021-10-9
True	Cpd 122: Diethylcyanamide	4.231	0.097	1930	13043	84.25	55	7	C5 H10 N2	55	84.25	W12N20_MAIN.L	122	Diethylcyanamide	10	617-83-4	9.319
True	Cpd 126: 1H-Pyrrole, 2-methyl-	4.336	0.155	60813	288405	95.48	80	25	C5 H7 N	80	95.48	W12N20_MAIN.L	126	1H-Pyrrole, 2-methyl-	10	636-41-9	8.981
True	Cpd 130: 3-Furanmethanol	4.443	0.168	2900	36637	83.63	98	15	C5 H6 O2	98	83.63	W12N20_MAIN.L	130	3-Furanmethanol	10	4412-91-3	10.307
True	Cpd 133: Pyridine, 3-methyl-	4.529	0.272	32628	322843	87.87	93	19	C6 H7 N	93	87.87	W12N20_MAIN.L	133	Pyridine, 3-methyl-	10	108-99-6	8.588
True	Cpd 136: 2-Propanone, 1-(acetyloxy)-	4.604	0.097	13725	29874	94.8	43	8	C5 H8 O3	43	94.8	W12N20_MAIN.L	136	2-Propanone, 1-(acetyloxy)-	10	592-20-1	9.096
True	Cpd 140: 1-(2-Thienyl)-3-(trimethylsilylmethyl)but-3-en-1-one	4.728	0.168	365	1870	83.85	73	2	C12 H18 O S Si	73	83.85	W12N20_MAIN.L	140	1-(2-Thienyl)-3-(trimethylsilylmethyl)but-3-en-1-one	2	990149-81-4	20.338
True	Cpd 141: 1H-Imidazole, 1-ethyl-	4.759	0.104	3299	22614	86.1	96	13	C5 H8 N2	96	86.1	NIST23.L	141	1H-Imidazole, 1-ethyl-	10	7098-07-09	11.857
True	Cpd 143: 2-Vinylfuran	4.8	0.097	3661	23078	81.54	94	16	C6 H6 O	94	81.54	W12N20_MAIN.L	143	2-Vinylfuran	10	1487-18-9	7.4
True	Cpd 144: 2,6-Lutidine	4.846	0.162	18190	112038	95.55	107	22	C7 H9 N	107	95.55	W12N20_MAIN.L	144	2,6-Lutidine	10	108-48-5	10.171
True	Cpd 145: Methylhistidine	4.86	0.084	1492	14422	81.37	96	10	C7 H11 N3 O2	96	81.37	W12N20_MAIN.L	145	Methylhistidine	10	990029-96-9	22.24
True	Cpd 146: (2R)-2-(2-iodanylethyl)oxirane	4.881	0.084	631	2585	81.58	57	3	C4 H7 I O	57	81.58	W12N20_MAIN.L	146	(2R)-2-(2-iodanylethyl)oxirane	4	76282-42-3	10.519
True	Cpd 149: Styrene	4.944	0.104	6884	39708	80.51	104	15	C8 H8	104	80.51	W12N20_MAIN.L	149	Styrene	10	100-42-5	9.772
True	Cpd 151: 2,4-Dihydroxypyridine	4.996	0.181	6947	51055	83.12	111	16	C5 H5 N O2	111	83.12	NIST23.L	151	2,4-Dihydroxypyridine	10	626-03-9	20.071
True	Cpd 152: N-Vinylacetamide	5.019	0.24	43609	308536	93.51	43	10	C4 H7 N O	43	93.51	W12N20_MAIN.L	152	N-Vinylacetamide	10	5202-78-8	8.464
True	Cpd 153: Pyrazine, 2,3-dimethyl-	5.055	0.123	7258	35771	81.34	108	13	C6 H8 N2	108	81.34	NIST23.L	153	Pyrazine, 2,3-dimethyl-	10	5910-89-4	10.461
True	Cpd 155: 1-Methyl-2,3-dihydro-4(1H)-pyridinone	5.112	0.13	1486	6764	81.82	111	6	C6 H9 N O	111	81.82	W12N20_MAIN.L	155	1-Methyl-2,3-dihydro-4(1H)-pyridinone	3	35488-00-7	11.321
True	Cpd 156: Pyridine, 2-ethyl-	5.139	0.123	22228	86770	92.29	106	13	C7 H9 N	106	92.29	W12N20_MAIN.L	156	Pyridine, 2-ethyl-	10	100-71-0	9.644
True	Cpd 157: 2-Cyclopenten-1-one, 2-methyl-	5.167	0.123	19562	113321	92.53	67	18	C6 H8 O	67	92.53	W12N20_MAIN.L	157	2-Cyclopenten-1-one, 2-methyl-	10	1120-73-6	8.883
True	Cpd 161: Pyrazine, ethyl-	5.279	0.11	55040	249333	96.58	107	29	C6 H8 N2	107	96.58	NIST23.L	161	Pyrazine, ethyl-	10	13925-00-3	10.138
True	Cpd 163: 3,5-Dioxatricyclo[5.2.1.0(4,10)]decane	5.316	0.097	1200	3959	85.78	110	3	C8 H12 O2	110	85.78	W12N20_MAIN.L	163	3,5-Dioxatricyclo[5.2.1.0(4,10)]decane	10	990009-16-8	8.984
True	Cpd 165: 1,3-Diazine	5.362	0.091	10280	88056	88.38	80	11	C4 H4 N2	80	88.38	W12N20_MAIN.L	165	1,3-Diazine	10	289-95-2	5.771
True	Cpd 166: 3-Deutero-1,2,4-Triazole	5.374	0.272	88201	1597862	87.5	42	21	C2 H2 D N3	42	87.5	W12N20_MAIN.L	166	3-Deutero-1,2,4-Triazole	10	39787-02-5
True	Cpd 167: 4-p-Tolylsulfinyl-3-methylpyrrolidino[1,2-b]isoxazolidine	5.387	0.058	1321	2618	86.49	110	2	C14 H19 N O2 S	110	86.49	W12N20_MAIN.L	167	4-p-Tolylsulfinyl-3-methylpyrrolidino[1,2-b]isoxazolidine	1	990214-94-4	30.997
True	Cpd 169: Exomethylenecyclohex-2-yl(4-methyl-phenyl) sulfone	5.426	0.168	32774	160900	89.05	94	11	C14 H18 O2 S	94	89.05	W12N20_MAIN.L	169	Exomethylenecyclohex-2-yl(4-methyl-phenyl) sulfone	10	990178-08-3	28.591
True	Cpd 174: [(1R,2R,4S)-3-azabicyclo[2.2.1]heptan-2-yl]methanol	5.548	0.071	2250	5163	88.73	68	3	C7 H13 N O	68	88.73	W12N20_MAIN.L	174	[(1R,2R,4S)-3-azabicyclo[2.2.1]heptan-2-yl]methanol	4	990004-74-1	14.302
True	Cpd 175: 1-Propa-1,2-dienylpyrrole	5.559	0.123	13670	82400	90.35	105	11	C7 H7 N	105	90.35	W12N20_MAIN.L	175	1-Propa-1,2-dienylpyrrole	10	990001-17-6
True	Cpd 177: 3,4-Dimethyl-1H-pyrrole	5.608	0.11	7433	34478	86.01	94	11	C6 H9 N	94	86.01	W12N20_MAIN.L	177	3,4-Dimethyl-1H-pyrrole	10	822-51-5	9.209
True	Cpd 179: Pentanoic acid, 2,4-dimethyl-, 3-phenylpropyl ester, (S)-	5.645	0.032	747	1413	91.77	118	4	C16 H24 O2	118	91.77	W12N20_MAIN.L	179	Pentanoic acid, 2,4-dimethyl-, 3-phenylpropyl ester, (S)-	10	125444-47-5	23.139
True	Cpd 181: 3-Methyl-2-isoxazoline-5-carboxylic acid methyl ester	5.696	0.052	521	1475	81.54	84	2	C6 H9 N O3	84	81.54	W12N20_MAIN.L	181	3-Methyl-2-isoxazoline-5-carboxylic acid methyl ester	6	55134-82-2	11.404
True	Cpd 183: 2-(N-Butylamino)-1-phenylpropyl propynyl ether	5.736	0.045	419	1409	90.47	117	3	C16 H23 N O	117	90.47	W12N20_MAIN.L	183	2-(N-Butylamino)-1-phenylpropyl propynyl ether	10	990166-99-3	25.13
True	Cpd 185: 2-Pyridinecarboxaldehyde	5.774	0.143	37936	205934	96.46	79	23	C6 H5 N O	79	96.46	W12N20_MAIN.L	185	2-Pyridinecarboxaldehyde	10	1121-60-4	10.493
True	Cpd 188: Aniline	5.862	0.11	26845	163948	83.84	93	27	C6 H7 N	93	83.84	W12N20_MAIN.L	188	Aniline	10	62-53-3	10.672
True	Cpd 190: 1-Vinyl-1-(3'-hydroxypropyl)cyclohexane	5.893	0.136	13232	51894	80.01	67	6	C11 H20 O	67	80.01	W12N20_MAIN.L	190	1-Vinyl-1-(3'-hydroxypropyl)cyclohexane	7	37542-18-0	17.191
True	Cpd 195: 4-Ethyl-3-methylpyridine	5.999	0.097	9347	68101	83.72	120	23	C8 H11 N	120	83.72	W12N20_MAIN.L	195	4-Ethyl-3-methylpyridine	10	76833-16-4	10.668
True	Cpd 196: 2-Cyclopenten-1-one, 3-methyl-	6.016	0.136	13505	102112	88.2	96	12	C6 H8 O	96	88.2	W12N20_MAIN.L	196	2-Cyclopenten-1-one, 3-methyl-	10	2758-18-1	8.034
True	Cpd 197: (3S,5S)-5-Ethyl-3,5-dihydroxy-oct-7-en-4-one	6.032	0.162	2353	11544	84.31	57	2	C10 H18 O3	57	84.31	W12N20_MAIN.L	197	(3S,5S)-5-Ethyl-3,5-dihydroxy-oct-7-en-4-one	5	990050-66-6	17.218
True	Cpd 200: 3-Azabicyclo[4.2.0]octa-1,3,5-triene	6.095	0.084	3496	23578	82.78	105	13	C7 H7 N	105	82.78	W12N20_MAIN.L	200	3-Azabicyclo[4.2.0]octa-1,3,5-triene	10	56911-27-4	9.238
True	Cpd 211: Acetamide, N-ethenyl-N-methyl-	6.317	0.279	17043	156886	84.73	56	14	C5 H9 N O	56	84.73	W12N20_MAIN.L	211	Acetamide, N-ethenyl-N-methyl-	10	3195-78-6	5.5
True	Cpd 212: 1-Nonen-3-one	6.339	0.13	2026	22900	80.56	29	10	C9 H16 O	29	80.56	W12N20_MAIN.L	212	1-Nonen-3-one	10	24415-26-7	11.027
True	Cpd 213: Pyridine, 2,3,6-trimethyl-	6.392	0.097	10240	60427	81	121	20	C8 H11 N	121	81	NIST23.L	213	Pyridine, 2,3,6-trimethyl-	10	1462-84-6	10.458
True	Cpd 217: Pyrazine, 2-ethyl-6-methyl-	6.467	0.052	13374	44933	81.87	121	12	C7 H10 N2	121	81.87	W12N20_MAIN.L	217	Pyrazine, 2-ethyl-6-methyl-	10	13925-03-6	10.1
True	Cpd 232: S-(-)-n-Octyl-1-phenylethyl carbonate	6.745	0.104	4800	17790	91.41	104	6	C17 H26 O3	104	91.41	W12N20_MAIN.L	232	S-(-)-n-Octyl-1-phenylethyl carbonate	10	990248-67-7	26.038
True	Cpd 234: 2-Acetylpyrazine	6.79	0.13	97095	969517	96.26	122	35	C6 H6 N2 O	122	96.26	Flavor2.L	234	2-Acetylpyrazine	10	22047-25-2	-4.603
True	Cpd 241: Ethanone, 1-(2-pyridinyl)-	6.962	0.123	15239	122746	87.31	79	21	C7 H7 N O	79	87.31	W12N20_MAIN.L	241	Ethanone, 1-(2-pyridinyl)-	8	1122-62-9	10.088
True	Cpd 245: 2,3-Diphenyl-4-pentenenitrile	7.027	0.117	3300	16155	86.81	119	5	C17 H15 N	119	86.81	W12N20_MAIN.L	245	2,3-Diphenyl-4-pentenenitrile	10	106046-51-9	25.823
True	Cpd 246: 2-Cyclopenten-1-one, 2,3-dimethyl-	7.048	0.091	10727	61665	81.5	67	26	C7 H10 O	67	81.5	W12N20_MAIN.L	246	2-Cyclopenten-1-one, 2,3-dimethyl-	10	1121-05-7	8.485
True	Cpd 247: p-Aminotoluene	7.072	0.091	9742	39703	86.99	106	9	C7 H9 N	106	86.99	W12N20_MAIN.L	247	p-Aminotoluene	10	106-49-0	11.345
True	Cpd 252: 1H-Imidazole, 1-acetyl-	7.163	0.207	36848	407968	80.78	68	31	C5 H6 N2 O	68	80.78	NIST23.L	252	1H-Imidazole, 1-acetyl-	10	2466-76-4	10.687
True	Cpd 254: 3-cyano-1,5-dimethoxypent-2-ene	7.195	0.065	964	2853	86.44	123	3	C8 H13 N O2	123	86.44	W12N20_MAIN.L	254	3-cyano-1,5-dimethoxypent-2-ene	6	118554-77-1	12.788
True	Cpd 260: Ethanone, 1-(1H-pyrrol-2-yl)-	7.348	0.162	42968	259639	95.9	94	28	C6 H7 N O	94	95.9	NIST23.L	260	Ethanone, 1-(1H-pyrrol-2-yl)-	10	1072-83-9	10.368
True	Cpd 261: 7-Propylizidine	7.367	0.117	690	1881	84.86	124	2	C11 H21 N	124	84.86	W12N20_MAIN.L	261	7-Propylizidine	6	120057-35-4	14.183
True	Cpd 266: [(E)-2-azidoethenyl]benzene	7.462	0.071	3880	15790	86.56	118	5	C8 H7 N3	118	86.56	W12N20_MAIN.L	266	[(E)-2-azidoethenyl]benzene	10	18756-03-1
True	Cpd 267: 1,3-Dithiane, 3-cyclopentene-1-methanol deriv.	7.482	0.078	7124	22533	83.5	119	10	C10 H16 O S2	119	83.5	W12N20_MAIN.L	267	1,3-Dithiane, 3-cyclopentene-1-methanol deriv.	10	71404-78-9	22.334
True	Cpd 297: dihydro-6,7-5H-cyclopenta[b]pyrazine	7.974	0.091	8464	75800	84.87	119	23	C7 H8 N2	119	84.87	W12N20_MAIN.L	297	dihydro-6,7-5H-cyclopenta[b]pyrazine	10	990003-05-4	9.259
True	Cpd 302: Benzoxazole, 2-methyl-	8.065	0.091	17286	96365	83.48	133	20	C8 H7 N O	133	83.48	W12N20_MAIN.L	302	Benzoxazole, 2-methyl-	10	95-21-6	11.018
True	Cpd 303: 3-Hydroxypyridine monoacetate	8.077	0.097	72811	528664	80.78	95	33	C7 H7 N O2	95	80.78	W12N20_MAIN.L	303	3-Hydroxypyridine monoacetate	10	17747-43-2	9.49
True	Cpd 310: 1-Acetyl-4-methyl-imidazole	8.197	0.143	39302	241916	92.48	81	17	C6 H8 N2 O	81	92.48	W12N20_MAIN.L	310	1-Acetyl-4-methyl-imidazole	10	990003-62-6	9.137
True	Cpd 312: (2-methylpyrimidin-4-yl)amine	8.232	0.318	14681	197948	84.37	109	11	C5 H7 N3	109	84.37	W12N20_MAIN.L	312	(2-methylpyrimidin-4-yl)amine	10	990001-43-0	8.018
True	Cpd 313: tert-Butyl(3-cyanomethyl-cyclohexa-1,4-dien-3-yl)methylphosphane-Borane	8.243	0.084	1475	8736	84.45	117	6	C13 H23 B N P	117	84.45	W12N20_MAIN.L	313	tert-Butyl(3-cyanomethyl-cyclohexa-1,4-dien-3-yl)methylphosphane-Borane	10	990143-23-4
True	Cpd 320: 2-Acetyl-4-methylpyridine	8.433	0.065	6743	38186	86.4	93	14	C8 H9 N O	93	86.4	W12N20_MAIN.L	320	2-Acetyl-4-methylpyridine	10	59576-26-0	10.501
True	Cpd 328: (S)-3-[Benzyl-methyl-amino]perhydropyrrolo[2,1-c][1,4]oxazin-4-one	8.578	0.084	829	3711	90.13	91	3	C15 H20 N2 O2	91	90.13	W12N20_MAIN.L	328	(S)-3-[Benzyl-methyl-amino]perhydropyrrolo[2,1-c][1,4]oxazin-4-one	6	990202-87-8	26.639
True	Cpd 339: 8-Methoxy-2,3-dihydro-2-phenyl-4-quinolone	8.808	0.097	17991	121553	84.35	108	22	C16 H15 N O2	108	84.35	W12N20_MAIN.L	339	8-Methoxy-2,3-dihydro-2-phenyl-4-quinolone	10	990186-27-7	29.642
True	Cpd 346: o-Aminoacetophenone oxime	8.913	0.084	6762	25725	89.48	132	7	C8 H8 N2	132	89.48	W12N20_MAIN.L	346	o-Aminoacetophenone oxime	10	0-00-0
True	Cpd 351: Paracetamol @ P606	9.007	0.052	14757	41491	83.08	109	11	C8 H9 N O2	109	83.08	PMW_Tox3.l	351	Paracetamol @ P606	10	103-90-2	2077.22
True	Cpd 357: (2-Deuterio-4-pyridyl)-dimethyl-amine	9.099	0.175	3065	16382	81.77	122	2	C7 H9 D N2	122	81.77	W12N20_MAIN.L	357	(2-Deuterio-4-pyridyl)-dimethyl-amine	1	990003-29-3
True	Cpd 370: 5-Ethoxy-3,4-dihydro-2H-pyrrole-2-carboximidsaure-ethylester	9.383	0.052	308	780	82.28	112	2	C9 H16 N2 O2	112	82.28	W12N20_MAIN.L	370	5-Ethoxy-3,4-dihydro-2H-pyrrole-2-carboximidsaure-ethylester	4	990047-71-1	10.267
True	Cpd 375: Methenamine	9.471	0.246	26901	125458	87.18	42	19	C6 H12 N4	42	87.18	W12N20_MAIN.L	375	Methenamine	10	100-97-0	8.663
True	Cpd 376: 2-Methyl-5-propoxypyridine	9.493	0.123	4744	24067	81.88	109	6	C9 H13 N O	109	81.88	W12N20_MAIN.L	376	2-Methyl-5-propoxypyridine	6	990014-83-5	10.09
True	Cpd 378: 1H-Imidazole, 2-methyl-4-(2-methylpropyl)-	9.53	0.071	2986	8207	87.38	95	3	C8 H14 N2	95	87.38	W12N20_MAIN.L	378	1H-Imidazole, 2-methyl-4-(2-methylpropyl)-	5	86921-33-7	10.803
True	Cpd 380: Propoxur-M/artifact P611	9.559	0.175	17410	107374	85.06	110	17	C9 H12 O2	110	85.06	PMW_Tox3.l	380	Propoxur-M/artifact P611	10	0-00-0	-9.055
True	Cpd 388: 1H-Indole, 5-chloro-2-methyl-	9.71	0.065	9211	21513	94.06	130	5	C9 H8 Cl N	130	94.06	W12N20_MAIN.L	388	1H-Indole, 5-chloro-2-methyl-	10	1075-35-0	14.357
True	Cpd 400: Pyrrolo[1,2-a]pyrazine, 4-methyl-	9.914	0.091	12852	72412	83.77	132	20	C8 H8 N2	132	83.77	W12N20_MAIN.L	400	Pyrrolo[1,2-a]pyrazine, 4-methyl-	10	64608-60-2	8.719
True	Cpd 403: 6-Methyl-1H-indazole	9.979	0.071	7273	24850	88.54	132	7	C8 H8 N2	132	88.54	W12N20_MAIN.L	403	6-Methyl-1H-indazole	10	698-24-8	13.504
True	Cpd 405: 1,7a-diaza-7aH-indene	10.01	0.117	8488	46018	80.13	118	15	C7 H6 N2	118	80.13	W12N20_MAIN.L	405	1,7a-diaza-7aH-indene	10	990002-84-1	7.124
True	Cpd 413: Pyrrolo[1,2-a]pyrazine	10.171	0.097	8720	44493	80.12	118	17	C7 H6 N2	118	80.12	W12N20_MAIN.L	413	Pyrrolo[1,2-a]pyrazine	10	274-45-3	6.963
True	Cpd 420: Spiro[Cyclopropyl-1,1'-indene]	10.29	0.058	2283	7722	81.14	142	5	C11 H10	142	81.14	W12N20_MAIN.L	420	Spiro[Cyclopropyl-1,1'-indene]	10	990010-58-8	9.426
True	Cpd 435: Benzonitrile, 2-(methylamino)-	10.618	0.104	23043	130954	87.02	131	20	C8 H8 N2	131	87.02	W12N20_MAIN.L	435	Benzonitrile, 2-(methylamino)-	10	17583-40-3	10.549
True	Cpd 449: 3-Acetoxy-2(1H)-pyridone	10.866	0.156	9563	61701	81.18	111	15	C7 H7 N O3	111	81.18	W12N20_MAIN.L	449	3-Acetoxy-2(1H)-pyridone	8	61296-14-8	9.184
True	Cpd 461: Oxirane, 2-(3-chloropropyl)-2-methyl-3-(phenylsulfinyl)-	11.11	0.091	2901	10337	87.96	126	5	C12 H15 Cl O2 S	126	87.96	W12N20_MAIN.L	461	Oxirane, 2-(3-chloropropyl)-2-methyl-3-(phenylsulfinyl)-	1	104354-59-8	22.44
True	Cpd 471: (3S,4S)-3-methyl-3,4-diphenyl-4-(trifluoromethyl)oxetan-2-one	11.252	0.104	2434	10545	85.05	132	3	C17 H13 F3 O2	132	85.05	W12N20_MAIN.L	471	(3S,4S)-3-methyl-3,4-diphenyl-4-(trifluoromethyl)oxetan-2-one	10	990319-12-7	21.348
True	Cpd 487: 2-(1H-pyrrol-1-yl)pyridine	11.567	0.11	8984	65132	83.19	144	26	C9 H8 N2	144	83.19	NIST23.L	487	2-(1H-pyrrol-1-yl)pyridine	10	50966-74-0	10.033
True	Cpd 502: Dipyrrolo[1,2-a:2',1'-c]pyrazine	11.861	0.123	4798	19139	80.82	156	7	C10 H8 N2	156	80.82	W12N20_MAIN.L	502	Dipyrrolo[1,2-a:2',1'-c]pyrazine	10	211-55-2	10.055
True	Cpd 529: (E)-3-Methyl-3-nitro-1-phenylbut-1-ene	12.37	0.039	2627	13998	88.91	144	4	C11 H13 N O2	144	88.91	W12N20_MAIN.L	529	(E)-3-Methyl-3-nitro-1-phenylbut-1-ene	10	990057-76-7	12.563
True	Cpd 543: 3-Phenyl-1,2,4-thiadiazole	12.628	0.181	1158	6368	80.66	104	4	C8 H6 N2 S	104	80.66	W12N20_MAIN.L	543	3-Phenyl-1,2,4-thiadiazole	4	990022-81-1
True	Cpd 556: 1,2,5-Trimethyl-1H-indole	12.886	0.104	2716	12535	85.4	159	6	C11 H13 N	159	85.4	W12N20_MAIN.L	556	1,2,5-Trimethyl-1H-indole	9	990021-02-7	9.531
True	Cpd 571: 3-Methyl-4-phenylpyridine	13.213	0.149	1717	12898	82.74	169	4	C12 H11 N	169	82.74	W12N20_MAIN.L	571	3-Methyl-4-phenylpyridine	10	990030-52-2	11.353
True	Cpd 577: 2,2-Dimethyl-6-carbamoyl-1,2-dihydropurine	13.352	0.168	471	2609	82.83	154	2	C5 H7 N5 O	154	82.83	W12N20_MAIN.L	577	2,2-Dimethyl-6-carbamoyl-1,2-dihydropurine	3	0-00-0
True	Cpd 592: 1-(Benzyloxycarbonl)-3-acetonylpiperidine	13.67	0.052	824	3083	82.52	217	3	C16 H21 N O3	217	82.52	W12N20_MAIN.L	592	1-(Benzyloxycarbonl)-3-acetonylpiperidine	1	990240-80-4	22.463
True	Cpd 604: (Z)-3-(2-Amino-4-chlorophenylthio)-N-phenylacrylamide	13.875	0.052	472	973	84.83	161	2	C15 H13 Cl N2 O S	161	84.83	W12N20_MAIN.L	604	(Z)-3-(2-Amino-4-chlorophenylthio)-N-phenylacrylamide	1	990313-73-8	33.058
True	Cpd 625: 1-Methyl-4-(N-nitroso-N-methylamino)-5-(N-methylcarbamoyl)-imidazole	14.296	0.078	1333	4803	82.73	167	5	C7 H11 N5 O2	167	82.73	W12N20_MAIN.L	625	1-Methyl-4-(N-nitroso-N-methylamino)-5-(N-methylcarbamoyl)-imidazole	1	990067-10-0	16.571
True	Cpd 666: 1H,3H-Pyrrolo[1,2-c]oxazol-1-one, 3-(1,1-dimethylethyl)tetrahydro-7a-(hydroxyphenylmethyl)-, [3R-[3.alpha.,7a.alpha.(S*)]]-	15.314	0.039	894	2560	84.23	182	2	C17 H23 N O3	182	84.23	W12N20_MAIN.L	666	1H,3H-Pyrrolo[1,2-c]oxazol-1-one, 3-(1,1-dimethylethyl)tetrahydro-7a-(hydroxyphenylmethyl)-, [3R-[3.alpha.,7a.alpha.(S*)]]-	3	86046-12-0	23.403
True	Cpd 667: (S)-4-Ethyl-2-[1-butyl-5-(N-phenylsulfonylamino)undecyl]-4,5-dihydrooxazoline	15.349	0.078	320	1183	84.46	77	2	C26 H44 N2 O3 S	77	84.46	W12N20_MAIN.L	667	(S)-4-Ethyl-2-[1-butyl-5-(N-phenylsulfonylamino)undecyl]-4,5-dihydrooxazoline	2	990585-31-0	42.985
True	Cpd 680: 6-Phenylbicyclo[3.3.0]oct-6-en-2-one	15.872	0.071	795	5380	80.83	170	4	C14 H14 O	170	80.83	W12N20_MAIN.L	680	6-Phenylbicyclo[3.3.0]oct-6-en-2-one	8	990070-02-2	12.095
True	Cpd 691: Spiro[3-Nitrochromen-2,2'-bicyclo[2.2.1]heptane]	16.266	0.039	321	501	87.22	121	2	C15 H15 N O3	121	87.22	W12N20_MAIN.L	691	Spiro[3-Nitrochromen-2,2'-bicyclo[2.2.1]heptane]	1	990195-72-6	17.834
True	Cpd 693: n-Hexadecanoic acid	16.426	0.175	48059	1151519	97.05	73	116	C16 H32 O2	73	97.05	W12N20_MAIN.L	693	n-Hexadecanoic acid	10	57-10-3	16.374
True	Cpd 708: 2H-Pyran-3-acetic acid, 6-[(acetyloxy)methyl]-2-ethoxy-3,6-dihydro-.alpha.-(phenylsulfonyl)-, methyl ester	17.116	0.143	477	2449	80.5	141	2	C19 H24 O8 S	141	80.5	W12N20_MAIN.L	708	2H-Pyran-3-acetic acid, 6-[(acetyloxy)methyl]-2-ethoxy-3,6-dihydro-.alpha.-(phenylsulfonyl)-, methyl ester	3	78081-27-3	31.167
True	Cpd 713: Terephthalic acid, isobutyl butyl ester	17.345	0.272	5477	286016	93.45	205	21	C16 H22 O4	205	93.45	W12N20_MAIN.L	713	Terephthalic acid, isobutyl butyl ester	10	990248-31-4	15.538
True	Cpd 719: 1-Docosene	17.773	0.22	1315	40585	86.81	69	19	C22 H44	69	86.81	W12N20_MAIN.L	719	1-Docosene	10	990325-56-3	18.86
True	Cpd 721: Octadecanoic acid	17.937	0.143	23306	583541	86.07	73	110	C18 H36 O2	73	86.07	NIST23.L	721	Octadecanoic acid	10	57-11-4	18.229
True	Cpd 722: Dodecanamide	18.099	0.097	3287	20766	81.96	59	10	C12 H25 N O	59	81.96	W12N20_MAIN.L	722	Dodecanamide	2	1120-16-7	8.951
True	Cpd 724: 6-(3,4-Dichlorophenyl)-4,5-dimethyl-8,9-dihydrofuro[2,3-h]chromen-2-one	18.196	0.078	2048	12235	93.04	57	9	C19 H14 Cl2 O3	57	93.04	W12N20_MAIN.L	724	6-(3,4-Dichlorophenyl)-4,5-dimethyl-8,9-dihydrofuro[2,3-h]chromen-2-one	10	990444-67-9	31.437
True	Cpd 726: Nonadecane	18.895	0.084	6049	46525	82.21	57	29	C19 H40	57	82.21	W12N20_MAIN.L	726	Nonadecane	10	629-92-5	12.772
True	Cpd 727: 5-Valeryl-6-([tert-butoxycarbonyl]amino)cyclooctene	19.149	0.596	264	5101	83.65	209	2	C18 H31 N O3	209	83.65	W12N20_MAIN.L	727	5-Valeryl-6-([tert-butoxycarbonyl]amino)cyclooctene	2	990326-98-5	18.784
True	Cpd 729: Docosane	19.565	0.123	10506	101045	83.04	57	34	C22 H46	57	83.04	SWGDRUG 3.11.L	729	Docosane	10	629-97-0
True	Cpd 737: Tetradecane, 2,5-dimethyl-	21.21	0.084	698	4576	93.75	57	7	C16 H34	57	93.75	W12N20_MAIN.L	737	Tetradecane, 2,5-dimethyl-	10	56292-69-4	3.506
True	Cpd 738: Decane, 2,2-dimethyl-	21.277	0.065	719	2872	84.93	57	5	C12 H26	57	84.93	W12N20_MAIN.L	738	Decane, 2,2-dimethyl-	10	17302-37-3	-2.444
True	Cpd 739: n-Tetracosane	21.43	0.097	10876	93060	87.63	57	39	C24 H50	57	87.63	SWGDRUG 3.11.L	739	n-Tetracosane	10	646-31-1
True	Cpd 740: 1,4-Benzenedicarboxylic acid, bis(2-ethylhexyl) ester	21.767	0.123	1414	32927	80.4	261	19	C24 H38 O4	261	80.4	W12N20_MAIN.L	740	1,4-Benzenedicarboxylic acid, bis(2-ethylhexyl) ester	10	6422-86-2	23.3
True	Cpd 741: (16R)-3-O-(tert-Butyldimethylsilyl)-13-(1'-hydroxymethyl)-16-(2"-(tetrahydropyranyl)oxy)-11.alpha.hydroxy-dihydrodeacylcynaropicrin	21.797	0.065	481	1484	86.69	43	2	C24 H40 O5 Si	43	86.69	W12N20_MAIN.L	741	(16R)-3-O-(tert-Butyldimethylsilyl)-13-(1'-hydroxymethyl)-16-(2"-(tetrahydropyranyl)oxy)-11.alpha.hydroxy-dihydrodeacylcynaropicrin	10	990560-00-3	25.12
True	Cpd 742: 3-Hydroxy-4,4-dimethyldihydro(2-13C)furan-2-one	21.861	0.058	645	1825	88.49	57	4	C6 H10 O3	57	88.49	W12N20_MAIN.L	742	3-Hydroxy-4,4-dimethyldihydro(2-13C)furan-2-one	10	990005-61-9
True	Cpd 744: Tetracosane	22.009	0.175	8166	82667	84.64	57	37	C24 H50	57	84.64	W12N20_MAIN.L	744	Tetracosane	10	646-31-1	17.991
True	Cpd 746: Phenol, 2-(1-phenylethyl)-	22.38	0.078	376	1965	93.38	57	3	C14 H14 O	57	93.38	W12N20_MAIN.L	746	Phenol, 2-(1-phenylethyl)-	10	4237-44-9	6.336
True	Cpd 747: Sulfurous acid, 2-ethylhexyl octadecyl ester	22.607	0.117	5471	59814	82.55	57	31	C26 H54 O3 S	57	82.55	W12N20_MAIN.L	747	Sulfurous acid, 2-ethylhexyl octadecyl ester	10	990570-33-5	30.143
True	Cpd 757: Decane, 2,3,8-trimethyl-	23.277	0.11	2896	39036	82.22	57	20	C13 H28	57	82.22	W12N20_MAIN.L	757	Decane, 2,3,8-trimethyl-	10	62238-14-6	-4.593
True	Cpd 773: 5-Cyano-1,2-dimethyl-4,5-diphenyl-4-.alpha.-pyridyl-.delta.2-imidazoline	23.927	0.104	246	863	86.14	208	3	C23 H20 N4	208	86.14	W12N20_MAIN.L	773	5-Cyano-1,2-dimethyl-4,5-diphenyl-4-.alpha.-pyridyl-.delta.2-imidazoline	2	67921-89-5	26.923
True	Cpd 779: N-[1-cyano-2-(2-methoxyphenyl)ethyl]acetamide	24.167	0.013	220	727	80.09	121	2	C12 H14 N2 O2	121	80.09	W12N20_MAIN.L	779	N-[1-cyano-2-(2-methoxyphenyl)ethyl]acetamide	1	990105-74-9	8.533
True	Cpd 782: 1,2-Diphenyl-1-butanol	24.367	0.045	239	633	84.52	107	2	C16 H18 O	107	84.52	W12N20_MAIN.L	782	1,2-Diphenyl-1-butanol	4	990124-90-0	6.683
True	Cpd 837: cis-N,O-Bis(methoxycarbonyl)-N-[[2-(methoxymethyl)cyclopropyl]methyl]hydroxylamine	28.524	0.026	198	261	86.15	67	2	C10 H17 N O6	67	86.15	W12N20_MAIN.L	837	cis-N,O-Bis(methoxycarbonyl)-N-[[2-(methoxymethyl)cyclopropyl]methyl]hydroxylamine	3	990170-29-9	-3.274
True	Cpd 839: Benzoic acid, 2,4-dimethoxy-6-propyl-, 4-carboxy-3-hydroxy-5-pentylphenyl ester	28.743	0.058	564	2856	80	207	4	C24 H30 O7	207	80	W12N20_MAIN.L	839	Benzoic acid, 2,4-dimethoxy-6-propyl-, 4-carboxy-3-hydroxy-5-pentylphenyl ester	7	104307-58-6	30.007
True	Cpd 842: 1-(Bromoethynyl)cyclohexan-1-on	29.71	0.019	222	204	81.91	97	2	C8 H11 Br O	97	81.91	W12N20_MAIN.L	842	1-(Bromoethynyl)cyclohexan-1-on	2	0-00-0

## Sheet: Chitligsan
Show/Hide	Label	RT	Width	Height	Area	Score	Base Peak	Ions	Formula	Precursor	Score (Lib)	Lib/DB	Cpd	Name	Hit Count	CAS ID	RT Diff
True	Cpd 3: Ethyl alcohol	0.742	0.123	96642	308305	99.28	31	11	C2 H6 O	31	99.28	Flavor2.L	3	Ethyl alcohol	10	64-17-5	1.444
True	Cpd 5: 1,1-bis(bromanyl)-2-chloranyl-2-fluoranyl-cyclopropane	1.449	0.11	1161818	1985282	91.95	44	5	C3 H2 Br2 Cl F	44	91.95	W12N20_MAIN.L	5	1,1-bis(bromanyl)-2-chloranyl-2-fluoranyl-cyclopropane	10	24071-57-6	14.451
True	Cpd 6: Propene	1.464	0.13	9550	43135	98.24	41	6	C3 H6	41	98.24	W12N20_MAIN.L	6	Propene	10	115-07-1	3.703
True	Cpd 7: 2-Butene	1.509	0.11	8750	63472	82.64	41	11	C4 H8	41	82.64	W12N20_MAIN.L	7	2-Butene	10	107-01-7	5.608
True	Cpd 9: 3-Methyl-1-butene P131	1.615	0.168	6553	38843	80.46	42	8	C5 H10	42	80.46	PMW_Tox3.l	9	3-Methyl-1-butene P131	10	563-45-1	-1.077
True	Cpd 10: Acetone	1.622	0.149	63495	198429	96.01	43	15	C3 H6 O	43	96.01	W12N20_MAIN.L	10	Acetone	10	67-64-1	5.961
True	Cpd 12: 1,3-Cyclopentadiene	1.735	0.175	9139	41234	91.28	66	10	C5 H6	66	91.28	W12N20_MAIN.L	12	1,3-Cyclopentadiene	10	542-92-7	7.665
True	Cpd 14: Cyclopropane, propyl-	1.871	0.201	5563	56769	92.78	41	13	C6 H12	41	92.78	W12N20_MAIN.L	14	Cyclopropane, propyl-	10	2415-72-7	8.462
True	Cpd 15: 4-Methyl-3-oxolanone	1.924	0.091	4257	11318	83.29	43	6	C5 H8 O2	43	83.29	W12N20_MAIN.L	15	4-Methyl-3-oxolanone	10	990000-80-6	11.76
True	Cpd 17: 1,4-Cyclohexadiene	2.146	0.039	10152	43071	94.23	79	13	C6 H8	79	94.23	W12N20_MAIN.L	17	1,4-Cyclohexadiene	10	628-41-1	9.254
True	Cpd 18: 1,3-Cyclopentadiene, 5-methyl-	2.173	0.052	8530	19741	87.84	79	4	C6 H8	79	87.84	W12N20_MAIN.L	18	1,3-Cyclopentadiene, 5-methyl-	10	96-38-8	8.244
True	Cpd 19: Benzene	2.293	0.402	9076	58024	85.5	78	12	C6 H6	78	85.5	W12N20_MAIN.L	19	Benzene	10	71-43-2	9.041
True	Cpd 21: 2-Butanone, 4-hydroxy-3-(hydroxymethyl)-3-methyl-	2.368	0.071	451	2035	89.82	43	4	C6 H12 O3	43	89.82	W12N20_MAIN.L	21	2-Butanone, 4-hydroxy-3-(hydroxymethyl)-3-methyl-	10	6868-97-9	16.882
True	Cpd 22: 1-Heptene	2.469	0.194	2207	24658	93.43	56	14	C7 H14	56	93.43	W12N20_MAIN.L	22	1-Heptene	10	592-76-7	9.314
True	Cpd 23: 3-Hexanone, 2,2-dimethyl-	2.56	0.155	405	3005	96.05	43	4	C8 H16 O	43	96.05	W12N20_MAIN.L	23	3-Hexanone, 2,2-dimethyl-	10	5405-79-8	11.906
True	Cpd 27: (3R,4S)-3,4-bis(ethenyl)-3-methyl-oxolane-2,5-dione	3.173	0.039	240	785	91.35	77	3	C9 H10 O3	77	91.35	W12N20_MAIN.L	27	(3R,4S)-3,4-bis(ethenyl)-3-methyl-oxolane-2,5-dione	4	990026-31-5	19.677
True	Cpd 28: 1-Ethenylcyclopenta-1,3-diene	3.286	0.045	4793	23848	90.48	91	5	C7 H8	91	90.48	W12N20_MAIN.L	28	1-Ethenylcyclopenta-1,3-diene	10	24460-02-4	9.097
True	Cpd 29: 2,4-Dimethyl-1-heptene	3.54	0.136	1335	17572	89.19	55	14	C9 H18	55	89.19	W12N20_MAIN.L	29	2,4-Dimethyl-1-heptene	10	19549-87-2	10.11
True	Cpd 30: 2,6,10 - trimethyl - tridecane (without stereochemistry)	3.66	0.123	554	5075	89.06	43	10	C16 H34	43	89.06	W12N20_MAIN.L	30	2,6,10 - trimethyl - tridecane (without stereochemistry)	10	3891-99-4	19.99
True	Cpd 32: Cyclotrisiloxane, hexamethyl-	3.931	0.071	2591	5664	83.23	207	6	C6 H18 O3 Si3	207	83.23	W12N20_MAIN.L	32	Cyclotrisiloxane, hexamethyl-	10	541-05-9	6.402
True	Cpd 37: Cyclopentaneacetonitrile, .alpha.-methoxy-	4.119	0.648	2873	50694	81.86	71	2	C8 H13 N O	71	81.86	W12N20_MAIN.L	37	Cyclopentaneacetonitrile, .alpha.-methoxy-	2	99765-38-5	14.498
True	Cpd 39: (2E)-penta-2,4-dienal	4.15	0.311	1905	29551	91.93	39	7	C5 H6 O	39	91.93	W12N20_MAIN.L	39	(2E)-penta-2,4-dienal	10	764-40-9	7.6
True	Cpd 40: 3,3-Dimethylnon-1-en-4-ol	4.231	0.259	648	5973	92.34	43	5	C11 H22 O	43	92.34	W12N20_MAIN.L	40	3,3-Dimethylnon-1-en-4-ol	10	990032-08-2	15.485
True	Cpd 42: 4-Methyl-N-[[3-[2-[6-[(4-methylanilino)methyl]-[1,2,4]triazolo[3,4-b][1,3,4]thiadiazol-3-yl]ethyl]-[1,2,4]triazolo[3,4-b][1,3,4]thiadiazol-6-yl]methyl]aniline	4.535	0.039	2903	10384	90.42	91	5	C24 H24 N10 S2	91	90.42	W12N20_MAIN.L	42	4-Methyl-N-[[3-[2-[6-[(4-methylanilino)methyl]-[1,2,4]triazolo[3,4-b][1,3,4]thiadiazol-3-yl]ethyl]-[1,2,4]triazolo[3,4-b][1,3,4]thiadiazol-6-yl]methyl]aniline	10	990615-38-8	72.015
True	Cpd 45: (2R,4aR,6R,8aR)-2,4a,6,8a-tetramethyl-2,3,4,6,7,8-hexahydro-[1,4]oxazino[3,2-b][1,4]oxazine	4.68	0.084	5815	32855	92.83	58	7	C10 H20 N2 O2	58	92.83	W12N20_MAIN.L	45	(2R,4aR,6R,8aR)-2,4a,6,8a-tetramethyl-2,3,4,6,7,8-hexahydro-[1,4]oxazino[3,2-b][1,4]oxazine	10	100082-91-5	22.653
True	Cpd 46: Piperazine	4.698	0.33	7598	262343	88.1	44	13	C4 H10 N2	44	88.1	W12N20_MAIN.L	46	Piperazine	10	110-85-0	12.152
True	Cpd 47: 1-(2-Pyridiniummethyl)pyridinium ditetrafluoroborate	4.75	0.026	177	315	80.57	94	2	C11 H12 B2 F8 N2	94	80.57	W12N20_MAIN.L	47	1-(2-Pyridiniummethyl)pyridinium ditetrafluoroborate	3	990414-34-0
True	Cpd 48: (4Z)-5-Methyl-4-undecene	4.92	0.11	1632	20721	90.91	56	17	C12 H24	56	90.91	W12N20_MAIN.L	48	(4Z)-5-Methyl-4-undecene	10	74630-69-6	15.063
True	Cpd 49: (3E)-1,3,7-Octatrien-5-yne	4.955	0.214	4531	19230	87.62	104	7	C8 H8	104	87.62	W12N20_MAIN.L	49	(3E)-1,3,7-Octatrien-5-yne	10	57830-27-0	8.745
True	Cpd 50: Undecane, 4-methyl-	5.044	0.058	648	2393	96.69	57	6	C12 H26	57	96.69	W12N20_MAIN.L	50	Undecane, 4-methyl-	10	2980-69-0	14.122
True	Cpd 59: 1H-Pyrrole, 2,4-dimethyl-	5.516	0.201	1112	12308	82.45	80	4	C6 H9 N	80	82.45	W12N20_MAIN.L	59	1H-Pyrrole, 2,4-dimethyl-	2	625-82-1	9.3
True	Cpd 64: Diethylbenzylaminomethylphosphonate hydrochloride	5.861	0.032	1359	2491	86.72	91	2	C12 H21 Cl N O3 P	91	86.72	W12N20_MAIN.L	64	Diethylbenzylaminomethylphosphonate hydrochloride	10	990285-39-9
True	Cpd 71: 4,5-Tridecadiene	6.025	0.324	594	8977	82.65	96	6	C13 H24	96	82.65	W12N20_MAIN.L	71	4,5-Tridecadiene	8	122471-93-6
True	Cpd 75: 1-Octene, 3,7-dimethyl-	6.345	0.305	2119	36680	93.08	41	22	C10 H20	41	93.08	W12N20_MAIN.L	75	1-Octene, 3,7-dimethyl-	10	4984-01-04	8.272
True	Cpd 80: Pyrazine, 2-ethyl-3-methyl-	6.59	0.253	8540	99194	82.83	121	15	C7 H10 N2	121	82.83	W12N20_MAIN.L	80	Pyrazine, 2-ethyl-3-methyl-	10	15707-23-0	9.977
True	Cpd 81: 5-Ethenyl-7-oxabicyclo[2.2.1]hept-5-en-2-one	6.644	0.194	3337	21846	82.06	94	5	C8 H8 O2	94	82.06	W12N20_MAIN.L	81	5-Ethenyl-7-oxabicyclo[2.2.1]hept-5-en-2-one	2	990007-12-5	11.072
True	Cpd 86: Triethylenediamine	6.81	0.343	13718	311895	96.25	42	29	C6 H12 N2	42	96.25	W12N20_MAIN.L	86	Triethylenediamine	10	280-57-9	9.273
True	Cpd 96: 2-[( 13',13',14',14',15',15',16',16',16'-Nonadeuterio-hexadeca-6,11-dien-1'-yl)oxy]-tetrahydropyran	7.3	0.052	245	611	84.17	119	2	C21 H29 D9 O2	119	84.17	W12N20_MAIN.L	96	2-[( 13',13',14',14',15',15',16',16',16'-Nonadeuterio-hexadeca-6,11-dien-1'-yl)oxy]-tetrahydropyran	1	990360-14-6
True	Cpd 99: (1-Methyl-1-[(1-methyl-1-phenylethyl)peroxy]ethyl)benzene	7.429	0.084	10189	35973	93.45	105	11	C18 H22 O2	105	93.45	W12N20_MAIN.L	99	(1-Methyl-1-[(1-methyl-1-phenylethyl)peroxy]ethyl)benzene	10	80-43-3	25.005
True	Cpd 100: 2,2,2-trifluoro-N-[2-(3-hydroxyphenyl)ethyl]acetamide	7.545	0.123	557	3019	88.72	107	3	C10 H10 F3 N O2	107	88.72	W12N20_MAIN.L	100	2,2,2-trifluoro-N-[2-(3-hydroxyphenyl)ethyl]acetamide	10	990137-67-8	18.238
True	Cpd 101: Pyrazine, 2,6-diethyl-	7.589	0.071	2692	9674	80.96	135	6	C8 H12 N2	135	80.96	W12N20_MAIN.L	101	Pyrazine, 2,6-diethyl-	10	13067-27-1	10.628
True	Cpd 118: 2-Benzoyl-3-phenyl-cyclopropane-1,1-dicarbonitrile	8.317	0.084	10288	23130	96.11	105	4	C18 H12 N2 O	105	96.11	W12N20_MAIN.L	118	2-Benzoyl-3-phenyl-cyclopropane-1,1-dicarbonitrile	10	990234-18-2	33.183
True	Cpd 123: 3-Cyclohexene-1,2-dione, 4,6,6-trimethyl-	8.423	0.149	380	3209	81.22	109	3	C9 H12 O2	109	81.22	W12N20_MAIN.L	123	3-Cyclohexene-1,2-dione, 4,6,6-trimethyl-	5	108946-91-4	12.71
True	Cpd 124: (Z,Z)-1,8-Dichloro-2,6-octadiene	8.448	0.11	632	2364	81.36	108	2	C8 H12 Cl2	108	81.36	W12N20_MAIN.L	124	(Z,Z)-1,8-Dichloro-2,6-octadiene	2	84117-76-0	12.936
True	Cpd 128: 2-ethenyl-3-ethylpyrazine	8.547	0.065	1659	7434	82.49	133	6	C8 H10 N2	133	82.49	W12N20_MAIN.L	128	2-ethenyl-3-ethylpyrazine	4	990006-63-2	9.503
True	Cpd 129: 4-((4-(dimethylamino)phenyl)(4-(dimethyliminio)cyclohexa-2,5-dien-1-ylidene)methyl)-N,N,n-trimethylanilinium dichloride	8.563	0.065	216	781	87.85	120	2	C26 H33 Cl2 N3	120	87.85	W12N20_MAIN.L	129	4-((4-(dimethylamino)phenyl)(4-(dimethyliminio)cyclohexa-2,5-dien-1-ylidene)methyl)-N,N,n-trimethylanilinium dichloride	2	82-94-0
True	Cpd 135: 1-Piperazineethanamine	8.775	0.402	17535	305701	92.27	99	26	C6 H15 N3	99	92.27	W12N20_MAIN.L	135	1-Piperazineethanamine	10	140-31-8	13.242
True	Cpd 139: 6-Methyl-1H-benzimidazol-3-ium-2-sulfonate	8.915	0.149	2026	8169	90.7	132	5	C8 H8 N2 O3 S	132	90.7	W12N20_MAIN.L	139	6-Methyl-1H-benzimidazol-3-ium-2-sulfonate	10	990093-39-0	24.768
True	Cpd 140: 3-Methyl-1H-indazole	8.919	0.052	2026	6686	89.2	132	4	C8 H8 N2	132	89.2	W12N20_MAIN.L	140	3-Methyl-1H-indazole	10	990006-15-9	14.164
True	Cpd 141: Cyclopropane, octyl-	8.949	0.13	2328	36689	89.98	56	26	C11 H22	56	89.98	W12N20_MAIN.L	141	Cyclopropane, octyl-	10	1472-09-9	9.668
True	Cpd 144: Tridecane, 7-hexyl-	9.046	0.136	800	4626	92.49	57	6	C19 H40	57	92.49	W12N20_MAIN.L	144	Tridecane, 7-hexyl-	10	7225-66-3	21.721
True	Cpd 163: N,1-Dimethyl-2-cyanopyrrole	9.647	0.143	3235	11049	85.1	120	8	C7 H8 N2	120	85.1	W12N20_MAIN.L	163	N,1-Dimethyl-2-cyanopyrrole	10	56341-36-7	8.703
True	Cpd 164: 1-Methyl-3,4-dihydropyrrolo[1,2-a]pyrazine	9.685	0.11	4697	23305	84.25	134	10	C8 H10 N2	134	84.25	W12N20_MAIN.L	164	1-Methyl-3,4-dihydropyrrolo[1,2-a]pyrazine	9	64608-66-8	9.248
True	Cpd 167: 1-Methoxy-4-[(4-methylhexa-4,5-dienyloxy)methyl]benzene	9.815	0.019	1074	1831	85.74	121	2	C15 H20 O2	121	85.74	W12N20_MAIN.L	167	1-Methoxy-4-[(4-methylhexa-4,5-dienyloxy)methyl]benzene	4	990136-84-1
True	Cpd 169: 6-Methyl-1H-indazole	9.912	0.065	2378	10743	83.99	132	10	C8 H8 N2	132	83.99	W12N20_MAIN.L	169	6-Methyl-1H-indazole	10	698-24-8	13.571
True	Cpd 173: (2R)-2-(2-iodanylethyl)oxirane	10.03	0.045	347	1155	83	71	2	C4 H7 I O	71	83	W12N20_MAIN.L	173	(2R)-2-(2-iodanylethyl)oxirane	5	76282-42-3	5.37
True	Cpd 174: Cyclopropane, 1,1-difluoro-2,2,3,3-tetramethyl-	10.059	0.104	442	1985	83.5	119	3	C7 H12 F2	119	83.5	W12N20_MAIN.L	174	Cyclopropane, 1,1-difluoro-2,2,3,3-tetramethyl-	9	823-25-6	-1.542
True	Cpd 184: 4-(3-Acetoxypropyl)phenol	10.352	0.117	762	3065	82.75	134	5	C11 H14 O3	134	82.75	W12N20_MAIN.L	184	4-(3-Acetoxypropyl)phenol	10	990062-61-5	15.965
True	Cpd 188: Imidazo[1,2-a]pyridin-6-amine	10.568	0.155	9737	49695	83.04	133	16	C7 H7 N3	133	83.04	W12N20_MAIN.L	188	Imidazo[1,2-a]pyridin-6-amine	10	235106-53-3	10.466
True	Cpd 207: 4-Ethyl-3-(hydroxymethyl)-2H-furan-5-one	11.231	0.149	7232	48769	83.66	125	12	C7 H10 O3	125	83.66	W12N20_MAIN.L	207	4-Ethyl-3-(hydroxymethyl)-2H-furan-5-one	10	990010-05-8	10.902
True	Cpd 210: Ethyl 5,5-dimethyl-4-oxo-2-(trifluoromethyl)hexanoate	11.292	0.065	749	2924	98.03	57	5	C11 H17 F3 O3	57	98.03	W12N20_MAIN.L	210	Ethyl 5,5-dimethyl-4-oxo-2-(trifluoromethyl)hexanoate	10	990187-19-1	7.108
True	Cpd 212: 6,7-Dihydro-5H-cyclopenta[d]pyrimidin-4-ylamine	11.331	0.149	14688	130505	87.07	134	26	C7 H9 N3	134	87.07	W12N20_MAIN.L	212	6,7-Dihydro-5H-cyclopenta[d]pyrimidin-4-ylamine	10	26979-06-6	11.102
True	Cpd 215: 4-Ethoxy-N,N-diisopropylbenzamide	11.523	0.13	735	3181	84.91	149	4	C15 H23 N O2	149	84.91	W12N20_MAIN.L	215	4-Ethoxy-N,N-diisopropylbenzamide	9	990176-26-0	17.661
True	Cpd 216: 1-N,3-N-dicyclohexyl-4-deuterio-2-methylidenepent-4-ene-1,3-diamine	11.544	0.039	373	1500	86.61	135	4	C18 H31 D N2	135	86.61	W12N20_MAIN.L	216	1-N,3-N-dicyclohexyl-4-deuterio-2-methylidenepent-4-ene-1,3-diamine	1	990244-16-5
True	Cpd 221: 4-(2-Cyanoundecan-2-ylazo)benzoic acid	11.668	0.058	225	748	83.47	149	2	C19 H27 N3 O2	149	83.47	W12N20_MAIN.L	221	4-(2-Cyanoundecan-2-ylazo)benzoic acid	2	990376-42-3	33.115
True	Cpd 226: 2,2-Difluoro-4-[(2',2'-dimethoxyethyl)amino]-5-(2'-hydroxyethyl)-6-methyl-1,3,2-dioxaborinane	11.882	0.045	380	997	84.69	84	3	C10 H18 B F2 N O5	84	84.69	W12N20_MAIN.L	226	2,2-Difluoro-4-[(2',2'-dimethoxyethyl)amino]-5-(2'-hydroxyethyl)-6-methyl-1,3,2-dioxaborinane	4	990254-69-6
True	Cpd 227: 4-Hydroxy-3-(2,4,6-trimethylphenyl)-2-benzopyran-1-one	11.913	0.13	1989	10477	83.74	147	4	C18 H16 O3	147	83.74	W12N20_MAIN.L	227	4-Hydroxy-3-(2,4,6-trimethylphenyl)-2-benzopyran-1-one	10	990253-98-9	29.871
True	Cpd 231: 1-Bromo-3-methyl-1-[(2'-nitrobenzene)sulfinyl]-1,2-butadiene	12.034	0.136	1516	32455	81.63	147	4	C11 H10 Br N O3 S	147	81.63	W12N20_MAIN.L	231	1-Bromo-3-methyl-1-[(2'-nitrobenzene)sulfinyl]-1,2-butadiene	3	990340-95-6
True	Cpd 233: 1H-Purin-6-amine, N-methyl-	12.202	0.117	6138	59463	80.52	149	24	C6 H7 N5	149	80.52	NIST23.L	233	1H-Purin-6-amine, N-methyl-	10	443-72-1	18.148
True	Cpd 234: 1-Decanol	12.242	0.084	1864	27957	90.93	55	22	C10 H22 O	55	90.93	W12N20_MAIN.L	234	1-Decanol	10	112-30-1	8.725
True	Cpd 238: 1-Mesityl-2-phenyl-ethanone	12.515	0.091	3968	12153	95.25	147	5	C17 H18 O	147	95.25	W12N20_MAIN.L	238	1-Mesityl-2-phenyl-ethanone	10	990151-76-8	21.518
True	Cpd 252: 3-[(1S,6R)-6-(p-Tolylsulfonyl)bicyclo[4.1.0]hept-1-yl]propionamide	13.325	0.058	740	1216	82.79	166	2	C17 H23 N O3 S	166	82.79	W12N20_MAIN.L	252	3-[(1S,6R)-6-(p-Tolylsulfonyl)bicyclo[4.1.0]hept-1-yl]propionamide	1	990356-48-8	31.509
True	Cpd 253: (2S)-2-pentyloxirane	13.337	0.084	527	1010	87.27	71	2	C7 H14 O	71	87.27	W12N20_MAIN.L	253	(2S)-2-pentyloxirane	10	990002-32-7	5.88
True	Cpd 256: 1-(4-Trifluoromethylbenzyl)-4-(hydroxymethyl)-1H-1,2,3-triazole	13.428	0.071	814	8884	82.45	159	2	C11 H10 F3 N3 O	159	82.45	W12N20_MAIN.L	256	1-(4-Trifluoromethylbenzyl)-4-(hydroxymethyl)-1H-1,2,3-triazole	2	990194-69-4
True	Cpd 262: (2R)-2-((1R,4R,4aS,8aS)-4,7-Dimethyl-1,2,3,4,4a,5,6,8a-octahydronaphthalen-1-yl)-1-phenylpropan-1-ol	13.738	0.091	1643	18528	80.46	162	11	C21 H30 O	162	80.46	W12N20_MAIN.L	262	(2R)-2-((1R,4R,4aS,8aS)-4,7-Dimethyl-1,2,3,4,4a,5,6,8a-octahydronaphthalen-1-yl)-1-phenylpropan-1-ol	10	990300-75-1	24.012
True	Cpd 268: Cyclohexadecane	14.141	0.065	992	11196	87.46	83	20	C16 H32	83	87.46	W12N20_MAIN.L	268	Cyclohexadecane	10	295-65-8	17.826
True	Cpd 271: 2-(t-Butyl)-3-benzoyl-4-methyl-4-ethyl-1,3-oxazolidin-5-one	14.304	0.026	3624	5263	88.28	105	4	C17 H23 N O3	105	88.28	W12N20_MAIN.L	271	2-(t-Butyl)-3-benzoyl-4-methyl-4-ethyl-1,3-oxazolidin-5-one	10	990276-42-5	23.296
True	Cpd 276: (1R,1'R)-(+)-N-(1-Phenylbutoxy)-5-(2-methylfuryl)-1-ethylamine	14.674	0.071	1130	2392	84.87	91	4	C17 H23 N O2	91	84.87	W12N20_MAIN.L	276	(1R,1'R)-(+)-N-(1-Phenylbutoxy)-5-(2-methylfuryl)-1-ethylamine	10	990236-18-2	19.459
True	Cpd 278: 3,5-Bis(trifluoromethyl)phenyl 1-phenylpropyl Sulfone	14.871	0.071	966	2098	87.77	91	2	C17 H14 F6 O2 S	91	87.77	W12N20_MAIN.L	278	3,5-Bis(trifluoromethyl)phenyl 1-phenylpropyl Sulfone	10	990507-66-3	18.512
True	Cpd 279: 4-Methyl-3-propylpyrrolidin-2-one	14.977	0.058	315	829	84.62	99	2	C8 H15 N O	99	84.62	W12N20_MAIN.L	279	4-Methyl-3-propylpyrrolidin-2-one	2	990009-78-0	3.089
True	Cpd 282: (4RS,5RS)-3-Benzoyl-4-[(benzyloxy)methyl]-5-propyl-1,3-oxazolidin-2-one	15.2	0.071	2942	5534	82.88	105	7	C21 H23 N O4	105	82.88	W12N20_MAIN.L	282	(4RS,5RS)-3-Benzoyl-4-[(benzyloxy)methyl]-5-propyl-1,3-oxazolidin-2-one	10	990430-74-6	33.4
True	Cpd 285: (endo)-spiro[Cyclopropane-1,3'-tricyclo[3.2.1.0(2,4)]decane]	15.367	0.058	1270	2520	87.83	91	3	C10 H14	91	87.83	W12N20_MAIN.L	285	(endo)-spiro[Cyclopropane-1,3'-tricyclo[3.2.1.0(2,4)]decane]	10	0-00-0
True	Cpd 286: P- 1,2-epoxy-1-phenyl-2-phenylsulfinylbutane	15.425	0.058	1051	1974	87.64	91	2	C16 H16 O2 S	91	87.64	W12N20_MAIN.L	286	P- 1,2-epoxy-1-phenyl-2-phenylsulfinylbutane	10	0-00-0
True	Cpd 289: (R)-10-Methyldodecanyl benzoate	15.651	0.045	1275	5305	84.99	105	9	C20 H32 O2	105	84.99	W12N20_MAIN.L	289	(R)-10-Methyldodecanyl benzoate	10	990315-54-2	20.832
True	Cpd 291: Methyl p-(1-methyl-2-hydroxyethyl)benzyl sulfoxide	15.735	0.065	715	1870	84.45	91	3	C11 H16 O2 S	91	84.45	W12N20_MAIN.L	291	Methyl p-(1-methyl-2-hydroxyethyl)benzyl sulfoxide	10	990094-07-5	15.181
True	Cpd 292: 2-Hexadecanone	15.947	0.078	4227	35513	81.43	58	29	C16 H32 O	58	81.43	W12N20_MAIN.L	292	2-Hexadecanone	10	18787-63-8	13.186
True	Cpd 294: n-Hexadecanoic acid	16.417	0.136	45072	1032255	96.67	73	92	C16 H32 O2	73	96.67	W12N20_MAIN.L	294	n-Hexadecanoic acid	10	57-10-3	16.383
True	Cpd 295: (1R)-Tetrahydropyran-(2RS)-2-yl [(1R,3R)-1-(1,3-dithiane-1,3-dioxide-2-yl)-1-phenyl]methyl ether	16.617	0.078	522	2152	84.63	85	2	C16 H22 O4 S2	85	84.63	W12N20_MAIN.L	295	(1R)-Tetrahydropyran-(2RS)-2-yl [(1R,3R)-1-(1,3-dithiane-1,3-dioxide-2-yl)-1-phenyl]methyl ether	1	990405-57-0
True	Cpd 298: 1-[2-(4-Methylphenyl)ethyl]piperazine	16.946	0.123	1413	7407	85.05	99	5	C13 H20 N2	99	85.05	W12N20_MAIN.L	298	1-[2-(4-Methylphenyl)ethyl]piperazine	10	990079-77-3	14.121
True	Cpd 299: Terephthalic acid, isobutyl butyl ester	17.338	0.117	8959	73039	92.81	205	23	C16 H22 O4	205	92.81	W12N20_MAIN.L	299	Terephthalic acid, isobutyl butyl ester	10	990248-31-4	15.546
True	Cpd 300: Hexane, 3,3-dimethyl-	17.459	0.084	2724	15866	82.15	57	16	C8 H18	57	82.15	W12N20_MAIN.L	300	Hexane, 3,3-dimethyl-	10	563-16-6	-5.259
True	Cpd 302: 3-Methoxysulfolane	17.524	0.065	925	3718	91.39	58	5	C5 H10 O3 S	58	91.39	W12N20_MAIN.L	302	3-Methoxysulfolane	10	990013-80-8
True	Cpd 306: Octadecanoic acid	17.925	0.13	14468	368182	91.27	73	70	C18 H36 O2	73	91.27	W12N20_MAIN.L	306	Octadecanoic acid	10	57-11-4	18.192
True	Cpd 307: (3R,5R)-5-Benzoyl-3-methyl-dihydro-furan-2-one	18.012	0.11	1025	2897	87.69	105	2	C12 H12 O3	105	87.69	W12N20_MAIN.L	307	(3R,5R)-5-Benzoyl-3-methyl-dihydro-furan-2-one	10	990079-21-3	11.254
True	Cpd 309: Pentatriacontane	18.186	0.11	10866	79212	87.87	57	30	C35 H72	57	87.87	W12N20_MAIN.L	309	Pentatriacontane	10	630-07-9	40.147
True	Cpd 311: Allyl-2,3,4,6-tetra-O-(3-methylbutyl)-.alpha.,D-galactopyranoside	18.626	0.039	199	315	85.7	43	2	C29 H56 O6	43	85.7	W12N20_MAIN.L	311	Allyl-2,3,4,6-tetra-O-(3-methylbutyl)-.alpha.,D-galactopyranoside	10	990608-46-8	31.64
True	Cpd 312: Tricosane	18.885	0.13	21685	175132	89.09	57	52	C23 H48	57	89.09	W12N20_MAIN.L	312	Tricosane	10	638-67-5	19.449
True	Cpd 314: 1-Butoxyoctane	19.377	0.052	333	716	83.41	57	2	C12 H26 O	57	83.41	W12N20_MAIN.L	314	1-Butoxyoctane	5	990051-21-9	2.123
True	Cpd 315: n-Tetracosane	19.555	0.162	16767	164738	88.51	57	45	C24 H50	57	88.51	SWGDRUG 3.11.L	315	n-Tetracosane	10	646-31-1
True	Cpd 318: Hexadecane, 1-iodo-	19.966	0.078	619	2687	91.47	57	4	C16 H33 I	57	91.47	W12N20_MAIN.L	318	Hexadecane, 1-iodo-	10	544-77-4	13.801
True	Cpd 321: Undecane, 3,8-dimethyl-	20.201	0.117	12553	104109	82.61	57	36	C13 H28	57	82.61	NIST23.L	321	Undecane, 3,8-dimethyl-	10	17301-30-3	0.283
True	Cpd 324: Sulfurous acid, octadecyl 2-propyl ester	20.821	0.337	10865	261162	85.84	57	39	C21 H44 O3 S	57	85.84	W12N20_MAIN.L	324	Sulfurous acid, octadecyl 2-propyl ester	10	990475-89-7	23.645
True	Cpd 329: Sulfurous acid, decyl 2-ethylhexyl ester	21.42	0.104	8680	66371	83.64	57	32	C18 H38 O3 S	57	83.64	W12N20_MAIN.L	329	Sulfurous acid, decyl 2-ethylhexyl ester	10	990387-67-7	18.08
True	Cpd 342: 2,2-Dimethylpropanoic acid 2-acetyloxyethyl ester	22.441	0.032	372	958	91.47	57	3	C9 H16 O4	57	91.47	W12N20_MAIN.L	342	2,2-Dimethylpropanoic acid 2-acetyloxyethyl ester	10	990052-91-7	-3.007
True	Cpd 343: Tritriacontane	22.597	0.117	5147	42682	90.79	57	24	C33 H68	57	90.79	W12N20_MAIN.L	343	Tritriacontane	10	630-05-7	32.403
True	Cpd 346: Phenol, 2-(1-phenylethyl)-	23.084	0.078	404	1547	93.81	57	3	C14 H14 O	57	93.81	W12N20_MAIN.L	346	Phenol, 2-(1-phenylethyl)-	10	4237-44-9	5.633
True	Cpd 353: Dodecane, 4-methyl-	24.028	0.123	1464	11452	83.33	57	8	C13 H28	57	83.33	W12N20_MAIN.L	353	Dodecane, 4-methyl-	10	6117-97-1	-3.212
True	Cpd 356: Hexane, 3-ethyl-3-methyl-	24.918	0.117	663	4838	87.68	57	5	C9 H20	57	87.68	W12N20_MAIN.L	356	Hexane, 3-ethyl-3-methyl-	10	3074-76-8	-11.068
True	Cpd 366: tert-Butyl 6-methyl-5-oxo-2,3-dihydro-1H-pyrrolizine-7a(5H)-carboxylate	27.243	0.052	254	2557	86.48	57	2	C13 H19 N O3	57	86.48	W12N20_MAIN.L	366	tert-Butyl 6-methyl-5-oxo-2,3-dihydro-1H-pyrrolizine-7a(5H)-carboxylate	2	990148-02-1	1.874
